# Supplementary material for: Right-censored models by the expectile method
Source: Springer Nature journal article supplement (doi:10.1007/s10985-024-09643-w), 2025-01-01
Supplement: 10985_2024_9643_MOESM1_ESM.pdf [file 10985_2024_9643_MOESM1_ESM.pdf]

| $n$  | $\lambda_n = n^{1/2}$ |      |          |           | $\lambda_n = n^{1/2-0.1}$ |      |          |           | $\lambda_n = n^{1/2-0.2}$ |      |          |           |
|------|-----------------------|------|----------|-----------|---------------------------|------|----------|-----------|---------------------------|------|----------|-----------|
|      | $L2$                  | $SD$ | % true 0 | % false 0 | $L2$                      | $SD$ | % true 0 | % false 0 | $L2$                      | $SD$ | % true 0 | % false 0 |
| 150  | 0.56                  | 0.16 | 99       | 7.6       | 0.48                      | 0.15 | 98       | 4.5       | 0.43                      | 0.13 | 97       | 2.2       |
| 200  | 0.47                  | 0.13 | 99       | 4.9       | 0.40                      | 0.12 | 99       | 2.2       | 0.37                      | 0.11 | 98       | 1.2       |
| 400  | 0.34                  | 0.08 | 100      | 1         | 0.28                      | 0.08 | 99       | 0.04      | 0.25                      | 0.08 | 99       | 0.04      |
| 1500 | 0.23                  | 0.08 | 100      | 0         | 0.21                      | 0.08 | 100      | 0         | 0.20                      | 0.07 | 99       | 0         |
| 2000 | 0.24                  | 0.10 | 100      | 0         | 0.22                      | 0.10 | 100      | 0         | 0.21                      | 0.10 | 99       | 0         |
| 4000 | 0.31                  | 0.13 | 100      | 0         | 0.29                      | 0.13 | 100      | 0         | 0.29                      | 0.13 | 100      | 0         |

**Table 9** Accuracy results ( $L2 \equiv \|\hat{\beta}_n - \beta^0\|$ ,  $SD \equiv sd((\hat{\beta}_n - \beta^0)_A)$ ), automatic selection (% true 0 and % false 0) of  $\hat{\beta}_n$  obtained by 500 Monte Carlo replications for censored adaptive LASSO expectile method, when  $\varepsilon \sim \mathcal{G}(0, 1)$ ,  $p = 50$ ,  $\beta_0^0 = 0$ ,  $\mathcal{A} = \{1, 2, 3, 4, 5\}$ , censoring rate 25%, models estimated without intercept.

### Supplementary Material: additional simulation results

Here we provide additional simulation results to complement those in Section 4.

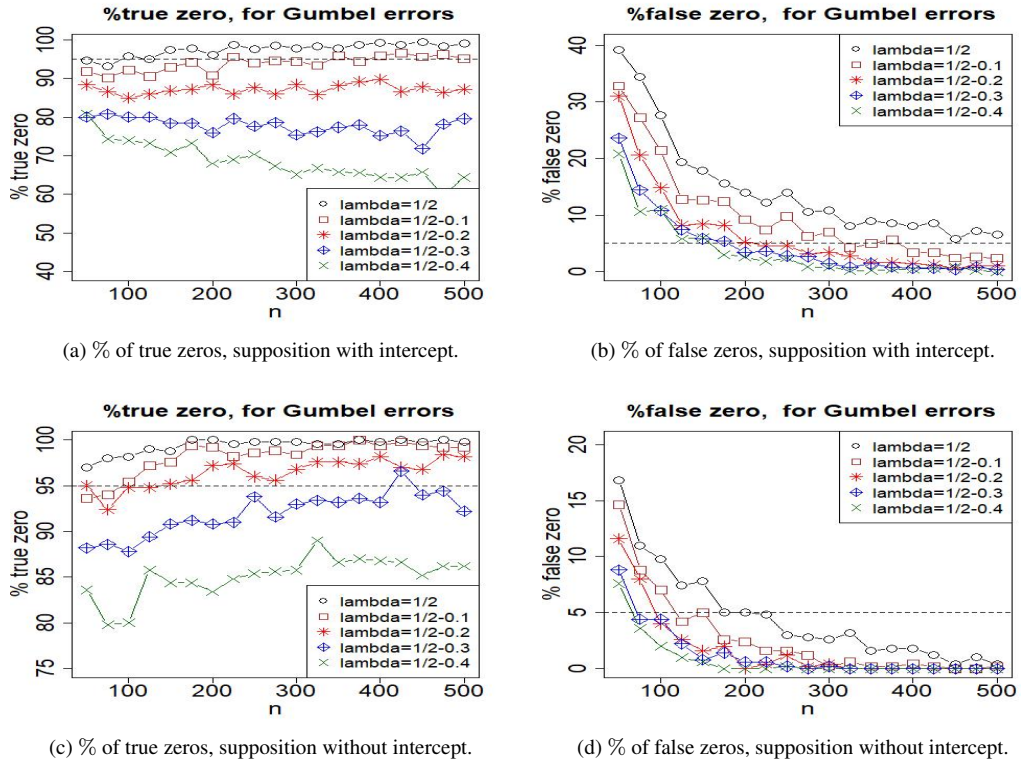

**Fig. 8** Percentage evolution of the true and false zeros with respect to  $n$  for five sequences  $\lambda_n$  by censored adaptive LASSO expectile method, for model without intercept ( $\beta_0^0 = 0$ ), when  $p = 10$ , censoring rate 25%,  $\varepsilon \sim \mathcal{G}(0, 1)$ .

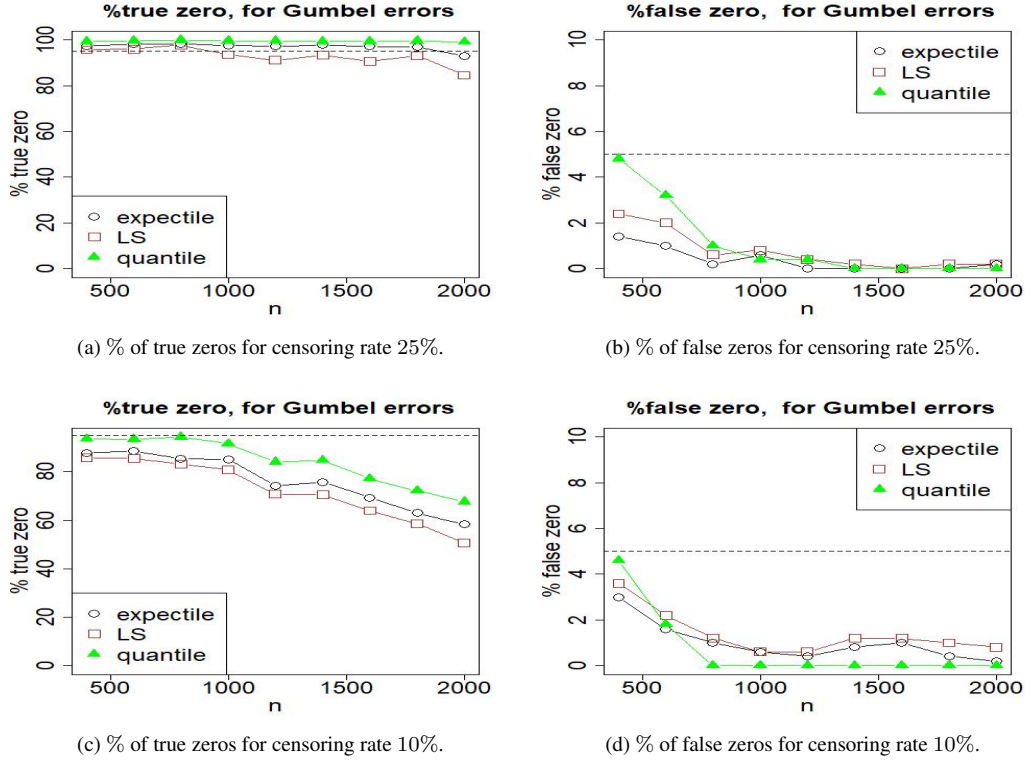

**Fig. 9** Percentage evolution of the true and false zeros by three censored adaptive LASSO estimation methods, for model without intercept ( $\beta_0^0 = 0$ ), supposition with intercept, when  $\varepsilon \sim \mathcal{G}(0, 1)$  and  $p = 10$ .

| $\beta_0^0$ | $\varepsilon$             | $n$ | $\hat{\tau}$ of (4) | (7) starting with $\varepsilon$ |          |           | (7) starting with $\eta^{(0)}(y_i)$ |          |           |
|-------------|---------------------------|-----|---------------------|---------------------------------|----------|-----------|-------------------------------------|----------|-----------|
|             |                           |     |                     | $\hat{\tau}^{(1)}$              | % true 0 | % false 0 | $\hat{\tau}^{(1)}$                  | % true 0 | % false 0 |
| 2           | $\mathcal{G}(0, 1)$       | 100 | 0.21                | 0.21                            | 94       | 0.6       | 0.56                                | 92       | 0.4       |
|             |                           | 100 | 0.29                | 0.29                            | 98       | 0         | 0.57                                | 98       | 0         |
|             | $\mathcal{U}(0, 1) - 1/6$ | 50  | 0.49                | 0.49                            | 93       | 2.5       | 0.57                                | 93       | 2.2       |
|             |                           | 100 | 0.50                | 0.50                            | 95       | 0.1       | 0.56                                | 95       | 0.1       |
|             |                           | 500 | 0.50                | 0.56                            | 98       | 0         | 0.63                                | 98       | 0         |
| 0           | $\mathcal{G}(0, 1)$       | 100 | 0.22                | 0.21                            | 93       | 0.1       | 0.55                                | 90       | 0.1       |
|             |                           | 100 | 0.28                | 0.28                            | 97       | 0         | 0.55                                | 97       | 0         |
|             | $\mathcal{U}(0, 1) - 1/6$ | 50  | 0.50                | 0.50                            | 90       | 1.9       | 0.57                                | 90       | 1.8       |
|             |                           | 100 | 0.49                | 0.48                            | 94       | 0.05      | 0.55                                | 94       | 0.05      |
|             |                           | 500 | 0.50                | 0.56                            | 99.6     | 0         | 0.62                                | 99.5     | 0         |

**Table 10** Estimation of  $\tau$  by 1000 Monte Carlo replications, for model without intercept ( $\beta_0^0 = 0$ ) and with intercept ( $\beta_0^0 = 2$ ), when  $p = 48$ ,  $\mathcal{A} = \{1, 2\}$ ,  $\beta_1^0 = 5$ ,  $\beta_2^0 = 1$ ,  $\lambda_n = n^{1/2-0.1}$ , censoring rate 25%.

| $\beta_0^0$ | $\varepsilon$             | $n$ | (7) starting with $\varepsilon$ |                   |                   | (7) starting with $\eta^{(0)}(y_i)$ |                   |                   |
|-------------|---------------------------|-----|---------------------------------|-------------------|-------------------|-------------------------------------|-------------------|-------------------|
|             |                           |     | $\hat{\beta}_1^0$               | $\hat{\beta}_2^0$ | $\hat{\beta}_3^0$ | $\hat{\beta}_1^0$                   | $\hat{\beta}_2^0$ | $\hat{\beta}_3^0$ |
| 2           | $\mathcal{G}(0, 1)$       | 100 | 4.55                            | 0.91              | -0.005            | 4.46                                | 0.88              | -0.01             |
|             | $\mathcal{U}(0, 1) - 1/6$ | 100 | 4.54                            | 0.90              | 0.001             | 4.48                                | 0.89              | 0.004             |
| 0           | $\mathcal{G}(0, 1)$       | 100 | 5.03                            | 1                 | -0.004            | 4.9                                 | 0.98              | -0.003            |
|             | $\mathcal{U}(0, 1) - 1/6$ | 100 | 5.03                            | 1                 | -0.002            | 4.95                                | 0.99              | -0.0008           |

**Table 11** Censored expectile estimation of  $\beta$  by 1000 Monte Carlo replications, for model without intercept ( $\beta_0^0 = 0$ ) and with intercept ( $\beta_0^0 = 2$ ), when  $p = 3$ ,  $\beta_1^0 = 5$ ,  $\beta_2^0 = 1$ ,  $\beta_3^0 = 0$ , censoring rate 25%.
